# Supplementary material for: An Antimicrobial Copper–Plastic Composite Coating: Characterization and In Situ Study in a Hospital Environment
Source: MDPI journal article supplement (doi:10.3390/ijms25084471), 2024-04-18
Supplement: s1 [file s1]

# An Antimicrobial Copper–Plastic Composite Coating: Characterization and In Situ Study in a Hospital Environment

Alexandre M. Emelyanenko <sup>1,\*</sup>, Fadi S. Omran <sup>1</sup>, Maria A. Teplonogova <sup>2</sup>, Marina Y. Chernukha <sup>1,3</sup>, Lusine R. Avetisyan <sup>1,3</sup>, Eugenia G. Tselikina <sup>3</sup>, Gleb A. Putsman <sup>1,4</sup>, Sergey K. Zyryanov <sup>1,5</sup>, Olga I. Butranova <sup>1,5</sup>, Kirill A. Emelyanenko <sup>1</sup>, Ludmila B. Boinovich <sup>1,\*</sup>

<sup>1</sup> A. N. Frumkin Institute of Physical Chemistry and Electrochemistry, Russian Academy of Sciences, Leninsky Prospekt 31, 119071 Moscow, Russia

<sup>2</sup> N. S. Kurnakov Institute of General and Inorganic Chemistry, Leninsky Prospekt 31, 119071 Moscow, Russia;

<sup>3</sup> Department of Medical Microbiology, Gamaleya National Research Center for Epidemiology and Microbiology, Ministry of Health of the Russian Federation, 18 Gamaleya St., 123098 Moscow, Russia

<sup>4</sup> City Clinical Hospital No. 24, Moscow City Health Department, 10 Pistsovaya St., 127015 Moscow, Russia

<sup>5</sup> Department of General and Clinical Pharmacology, Institute of Medicine, Peoples' Friendship University of Russia named after Patrice Lumumba, 6 Miklukho-Maklaya St. 117198 Moscow, Russia

\* Correspondence: ame@phych.ac.ru (A.M.E.); boinovich@mail.ru (L.B.B.); Tel.: +7-495-955-4625 (A.M.E.)

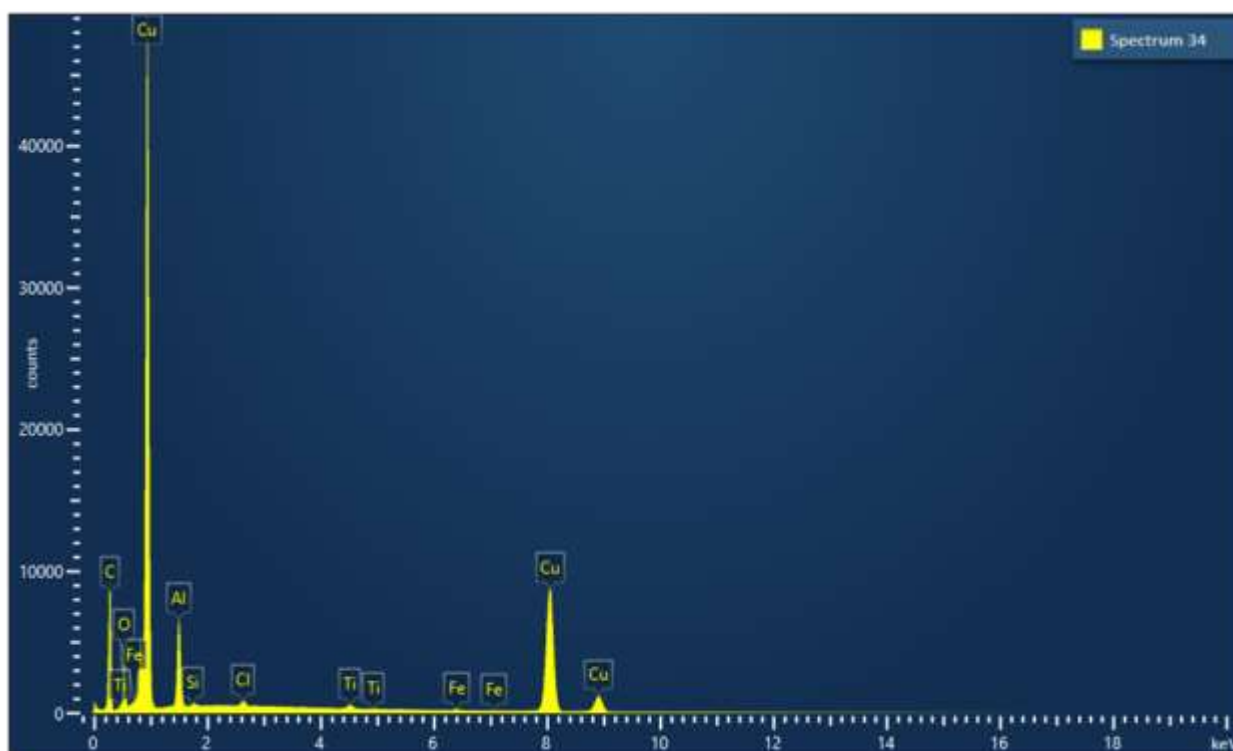

Figure S1. Typical EDS spectra of the ABS plastic switch after application of a copper coating.

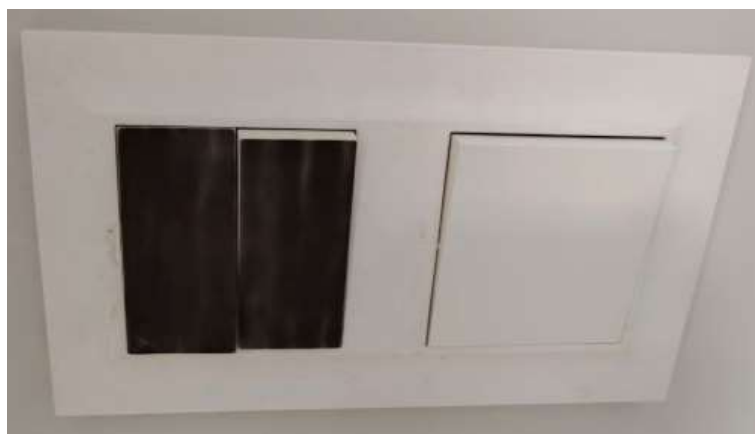

**Figure S2.** Electric light switch: left paired buttons were coated with a copper layer whereas the right single button was uncoated common ABS plastic.
